# Supplementary material
Source: PubMed Central journal article supplement (PMC3675915)
Supplement: AEM.00376-13_zam999104427so1.pdf [file AEM.00376-13_zam999104427so1.pdf]

1 Supporting Online Material

2 **Rational design of a novel propeptide for improving active**  
3 **production of *Streptomyces griseus* trypsin in *Pichia pastoris***

4

5 Zhenmin Ling<sup>a,b</sup>, Yi Liu<sup>a,b</sup>, Shaolei Teng<sup>c</sup>, Zhen Kang<sup>a,b\*</sup>, Jingjing Zhang<sup>b</sup>, Jian Chen<sup>b,d</sup> and  
6 Guocheng Du<sup>b,e\*</sup>

7 <sup>a</sup>The Key Laboratory of Industrial Biotechnology, Ministry of Education, Jiangnan University, Wuxi  
8 214122, China

9 <sup>b</sup>School of Biotechnology, Jiangnan University, Wuxi 214122, China

10 <sup>c</sup>Department of Genetics & Biochemistry, Clemson University, Clemson, South Carolina, U. S. A.

11 <sup>d</sup>National Engineering Laboratory for Cereal Fermentation Technology, Jiangnan University, Wuxi  
12 214122, China

13 <sup>e</sup>The Key Laboratory of Carbohydrate Chemistry and Biotechnology, Ministry of Education, Jiangnan  
14 University, Wuxi 214122, China

15 \*Corresponding authors:

16 Zhen Kang, Address: School of Biotechnology, Jiangnan University, 1800 Lihu Avenue, Wuxi 214122,  
17 China, Tel: +86-510-85918307, Fax: +86-510-85918309, E-mail: zkang@jiangnan.edu.cn.

18 Guocheng Du, Address: School of Biotechnology, Jiangnan University, 1800 Lihu Avenue, Wuxi  
19 214122, China, Tel: +86-510-85918309, Fax: +86-510-85918309, E-mail: gcdu@jiangnan.edu.cn.

20

21 Running title: Rational design of a propeptide for trypsin production

22

23

24

25

26

27

28

**TABLE S1** Strains and plasmids used in this study

| Strains and plasmids                       | Genotype and characteristics                                                                                    | Reference  |
|--------------------------------------------|-----------------------------------------------------------------------------------------------------------------|------------|
| Strains                                    |                                                                                                                 |            |
| <i>S. griseus</i> ATCC 10137 <sup>TM</sup> | <i>Streptomyces griseus</i> subsp. <i>griseus</i>                                                               | (1)        |
| <i>P. pastoris</i> GS115                   | <i>his4</i> Mut <sup>+</sup> His <sup>-</sup> ( <i>aox1</i> <sup>+</sup> , <i>aox2</i> <sup>+</sup> ),          | (2)        |
| <i>E. coli</i> JM109                       | F' <i>traD36 proA</i> <sup>+</sup> <i>B</i> <sup>+</sup> <i>lacIq</i> Δ( <i>lacZ</i> )M15/Δ( <i>lac-proAB</i> ) | Lab stock  |
| Exmt                                       | <i>P. pastoris</i> GS115 harboring pPIC9k-Exmt                                                                  | This study |
| ExAPNPmt                                   | <i>P. pastoris</i> GS115 harboring pPIC9k-ExAPNPmt                                                              | This study |
| ExPNPmt                                    | <i>P. pastoris</i> GS115 harboring pPIC9k-ExPNPmt                                                               | This study |
| ExNPmt                                     | <i>P. pastoris</i> GS115 harboring pPIC9k-ExNPmt                                                                | This study |
| ExPmt                                      | <i>P. pastoris</i> GS115 harboring pPIC9k-ExPmt                                                                 | This study |
| ExYmt                                      | <i>P. pastoris</i> GS115 harboring pPIC9k-ExYmt                                                                 | This study |
| APNPmt                                     | <i>P. pastoris</i> GS115 harboring pPIC9k-APNPmt                                                                | This study |
| Pmt                                        | <i>P. pastoris</i> GS115 harboring pPIC9k-Pmt                                                                   | This study |
| mt                                         | <i>P. pastoris</i> GS115 harboring pPIC9k-mt                                                                    | This study |
| RIRImt                                     | <i>P. pastoris</i> GS115 harboring pPIC9k-RIRImt                                                                | This study |
| YVERmt                                     | <i>P. pastoris</i> GS115 harboring pPIC9k-YVERmt                                                                | This study |
| YVEImt                                     | <i>P. pastoris</i> GS115 harboring pPIC9k-YVEImt                                                                | This study |
| RVEFmt                                     | <i>P. pastoris</i> GS115 harboring pPIC9k-RVEFmt                                                                | This study |
| IVEFmt                                     | <i>P. pastoris</i> GS115 harboring pPIC9k-IVEFmt                                                                | This study |
| Plasmids                                   |                                                                                                                 |            |
| pPIC9k                                     | <i>HIS4 Amp</i> <sup>r</sup> or <i>Kan</i> <sup>r</sup>                                                         | (2)        |
| pPIC9k-Exmt                                | pPIC9k inserted of fragment Exmt                                                                                | This study |
| pPIC9k-ExAPNPmt                            | pPIC9k inserted of fragment ExAPNPmt                                                                            | This study |
| pPIC9k-ExPNPmt                             | pPIC9k inserted of fragment ExPNPmt                                                                             | This study |
| pPIC9k-ExNPmt                              | pPIC9k inserted of fragment ExNPmt                                                                              | This study |
| pPIC9k-ExPmt                               | pPIC9k inserted of fragment ExPmt                                                                               | This study |
| pPIC9k-ExYmt                               | pPIC9k inserted of fragment ExYmt                                                                               | This study |
| pPIC9k-APNPmt                              | pPIC9k inserted of fragment APNPmt                                                                              | This study |
| pPIC9k-Pmt                                 | pPIC9k inserted of fragment Pmt                                                                                 | This study |
| pPIC9k-mt                                  | pPIC9k inserted of fragment mt                                                                                  | This study |
| pPIC9k-RIRImt                              | pPIC9k inserted of fragment RIRImt                                                                              | This study |
| pPIC9k-YVERmt                              | pPIC9k inserted of fragment YVERmt                                                                              | This study |
| pPIC9k-YVEImt                              | pPIC9k inserted of fragment YVEImt                                                                              | This study |
| pPIC9k-RVEFmt                              | pPIC9k inserted of fragment RVEFmt                                                                              | This study |
| pPIC9k-IVEFmt                              | pPIC9k inserted of fragment IVEFmt                                                                              | This study |

33

34

**TABLE S2** Primers used in this study

| Primers              | Sequence (5'→3')                                   |
|----------------------|----------------------------------------------------|
| Exmt-5'              | CCGGAATTCGTCGTCGGCGGAACCC                          |
| ExAPNPmt-5'          | CCGGAATTCGCTCCAAACCCAGTCGTCGGCGGAACCC              |
| ExPNPmt-5'           | CCGGAATTC <del>C</del> CCAAACCCAGTCGTCGGCGGAACCC   |
| ExNPmt-5'            | CCGGAATTC <del>A</del> AACCCAGTCGTCGGCGGAACCC      |
| ExPmt-5'             | CCGGAATTC <del>C</del> CCAGTCGTCGGCGGAACCC         |
| ExYmt-5'             | CCGGAATTC <del>T</del> ACGTCGTCGGCGGAACCC          |
| $\alpha$ F-5'        | CGGGATCC <b>AAAC</b> CGATGAGATTTCCTTCAATTTTTACTGC  |
| APNPmt-5'            | AGTTTCAGCCTCTCTTTTCTCGGCTCCAAACCCAGTCGTCGGCGGAACCC |
| $\alpha$ F-APNPmt-3' | GGGTTCCGCCGACGACTGGGTTTGAGCCGAGAAAAGAGAGGCTGAAGCT  |
| Pmt-5'               | AGTTTCAGCCTCTCTTTTCTCGCCAGTCGTCGGCGGAACCC          |
| $\alpha$ F-Pmt-3'    | GGGTTCCGCCGACGACTGGCGAGAAAAGAGAGGCTGAAGCT          |
| mt-5'                | AGTTTCAGCCTCTCTTTTCTCG GTCGTCGGCGGAACCC            |
| $\alpha$ F-mt-3'     | GGGTTCCGCCGACGACCGAGAAAAGAGAGGCTGAAGCT             |
| RIRImt-5'            | AGTTTCAGCCTCTCTTTTCTCGAGAATTAGAATTGTCGTCGGCGGAACCC |
| $\alpha$ F-RIRImt-3' | GGGTTCCGCCGACGACAATTCTAATTCTCGAGAAAAGAGAGGCTGAAGCT |
| YVERmt-5'            | AGTTTCAGCCTCTCTTTTCTCGTACGTTGAAAGAGTCGTCGGCGGAACCC |
| $\alpha$ F-YVERmt-3' | GGGTTCCGCCGACGACTCTTTCAACGTACGAGAAAAGAGAGGCTGAAGCT |
| YVEImt-5'            | AGTTTCAGCCTCTCTTTTCTCGTACGTTGAAATTGTCGTCGGCGGAACCC |
| $\alpha$ F-YVEImt-3' | GGGTTCCGCCGACGACAATTTCAACGTACGAGAAAAGAGAGGCTGAAGCT |
| RVEFmt-5'            | AGTTTCAGCCTCTCTTTTCTCGAGAGTTGAATTTGTCGTCGGCGGAACCC |
| $\alpha$ F-RVEFmt-3' | GGGTTCCGCCGACGACAAATTCAACTCTCGAGAAAAGAGAGGCTGAAGCT |
| IVEFmt-5'            | AGTTTCAGCCTCTCTTTTCTCGATTGTTGAATTTGTCGTCGGCGGAACCC |
| $\alpha$ F-IVEFmt-3' | GGGTTCCGCCGACGACAAATTCAACAATCGAGAAAAGAGAGGCTGAAGCT |
| * mt-3'              | ATAAGAAT <u>GCGGCCGCT</u> CAGAGCGTGCGGGCGG         |
| AOX primer-5'        | GACTGGTTCCAATTGACAAGC                              |
| AOX primer-3'        | TCCTACAGTCTTACGGTAAACGG                            |

35

\* mt-3' was used as the downstream primer for all the recombinant trypsins or trypsinogens; The base  
underlined means the restriction enzyme sites; The base in bold means the Kozark sequence.

36

37

38

39

40

41

42

43

44

45

46

47

48

**TABLE S3** Calculated parameters of the simulated structure of the trypsin mutants

| Mutants  | Residues | H-bonds | Ion pairs | $\pi$ -interactions | Secondary structure % |                |       |       |
|----------|----------|---------|-----------|---------------------|-----------------------|----------------|-------|-------|
|          |          |         |           |                     | $\alpha$ -helix       | $\beta$ -sheet | turn  | coil  |
| SGT      | 223      | 620     | 11        | 1                   | 10.3%                 | 39.9%          | 21.1% | 28.7% |
| Exmt     | 227      | 312     | 8         | 5                   | 8.0%                  | 25.7%          | 17.3% | 49.1% |
| ExAPNPmt | 231      | 306     | 9         | 4                   | 5.2%                  | 22.2%          | 17.0% | 55.7% |
| ExPNPmt  | 230      | 147     | 0         | 0                   | 7.0%                  | 26.1%          | 14.3% | 52.6% |
| ExNPmt   | 229      | 123     | 1         | 4                   | 7.0%                  | 25.8%          | 11.8% | 55.5% |
| ExPmt    | 228      | 126     | 0         | 1                   | 5.7%                  | 25.0%          | 15.4% | 53.9% |
| ExYmt    | 228      | 164     | 3         | 4                   | 8.8%                  | 25.4%          | 17.5% | 48.2% |
| APNPmt   | 227      | 113     | 2         | 0                   | 8.4%                  | 26.0%          | 10.6% | 55.1% |
| Pmt      | 224      | 120     | 3         | 0                   | 4.9%                  | 29.0%          | 9.8%  | 56.3% |
| RIRImt   | 227      | 163     | 5         | 5                   | 8.8%                  | 27.8%          | 17.6% | 45.8% |
| YVERmt   | 227      | 165     | 8         | 4                   | 8.8%                  | 26.4%          | 17.6% | 47.1% |
| YVEImt   | 227      | 159     | 6         | 6                   | 8.8%                  | 27.3%          | 17.6% | 46.3% |
| RVEFmt   | 227      | 174     | 6         | 4                   | 8.8%                  | 26.4%          | 17.6% | 47.1% |
| IVEFmt   | 227      | 176     | 7         | 5                   | 8.8%                  | 25.6%          | 17.6% | 48.0% |

49

50

51

52

53

54

55

56

57

58

59

60

61

62

63

64

65

66

67

68

69

70

71

72

73 **FIG S1** PCR confirmation of the integrated transformants with **AOX primer-5'** and **AOX**

74 **primer-3'**. (A) Confirmation of the trypsin mutants with the native propeptide and its stepwise

75 deletion mutants. (B) Confirmation of the trypsin mutants with designed propeptides.

76

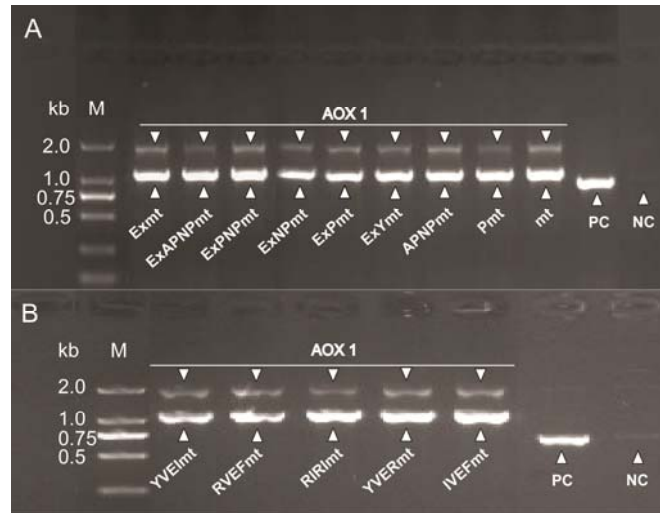

77

78

79

80

81

82

83

84

85

86

87

88

89

90

91

92

93

94

95

96

97

98

99

100

101

102

103

## 104 **Construction of the recombinant vectors**

105 *Streptomyces griseus* ATCC 10137 was purchased from the American Type Culture  
106 Collection and used for amplification of the trypsin gene. *Pichia pastoris* GS115 and the  
107 chromosome-integrated vector pPIC9k both were purchased commercially (Invitrogen, San Diego,  
108 CA, USA). The liberated inserts and digested expression vectors were electrophoresed and  
109 recovered using Agarose Gel DNA Purification Kit Ver.2.0 (TaKaRa, Dalian, China). The  
110 recombinant vectors were confirmed by sequencing using primers AOX primer-5' and AOX  
111 primer-3' (Table S2).

112 Oligonucleotides Exmt-5'/mt-3', ExAPNPmt-5'/mt-3', ExPNPmt-5'/mt-3', ExNPmt-5'/mt-3',  
113 ExPmt-5'/mt-3' and ExYmt-5'/mt-3' (Table S2) were used for amplification and construction of  
114 recombinants Exmt, ExAPNPmt, ExPNPmt, ExNPmt, ExPmt and ExYmt (Table S1), respectively.  
115 After digesting by *EcoRI* and *NotI*, the fragments were subcloned into pPIC9k (Fig. 1B). For  
116 construction of the recombinants APNPmt, Pmt, mt, RIRImt, YVERmt, YVEImt, RVEFmt and  
117 IVEFmt (Table S1), the  $\alpha$ -factor signal peptide was welded by the fusion PCR method. After  
118 successful assembly, the recombinant fragments were digested with *BamHI* and *NotI* and  
119 subcloned into pPIC9k to generate the corresponding plasmids (Table S1).

## 120 **Purification and SDS-PAGE analysis**

121 All the trypsin mutants were purified by affinity chromatography. After centrifugation at  
122 8,000 rpm for 10 min, the culture supernatant was concentrated and was further precipitated with  
123 25-55% ammonium sulfate. The sediment was resuspended in 5 ml of buffer A (10 mM Tris-HCl,  
124 pH 8.0, 10% glycerol, and 1 mM EDTA) and dialyzed overnight against 100 ml buffer A. The  
125 sample was loaded onto a Hitrap benzamidine FF column ( $\Phi$ 1.6 $\times$ 2.5 cm, GE Healthcare, catalog  
126 number 17-5144-01) previously equilibrated with buffer A, and the column was washed with  
127 buffer B (10 mM NaOAc, pH 5.0, 10% glycerol, 1 mM EDTA, and 0.5M NaCl). After that, 10  $\mu$ l  
128 ultrafiltrated purified enzymes supernatant were loaded onto the gel by SDS-PAGE analysis and  
129 the single bands showed in the pictures are the recombinant trypsins.

## 130 **Determination of trypsin activity**

131 Trypsin activity was measured spectrophotometrically as the release of *p*-nitroaniline by  
132 enzymatic hydrolysis of the artificial substrate  $N_{\alpha}$ -benzoyl-DL-arginine-*p*-nitroanilide (BAPNA).  
133 Briefly, samples (100  $\mu$ l) were mixed with 800  $\mu$ l of assay buffer (50 mM Tris-HCl, pH 8.0; 0.02

134 M CaCl<sub>2</sub> at 37°C) and 100 µl 0.1 M BAPNA. The change in absorbance at 410 nm was recorded  
135 by spectrophotometer (UV-2450 PC, Shimadzu). One BAPNA unit (U ml<sup>-1</sup>) trypsin was defined  
136 as the amount of enzyme required for producing an absorbance increase of 0.1 under the above  
137 conditions. Trypsin activity was calculated according to Eq. (1) \* df-dilution factor

$$\text{BAPNA unit ( U ml}^{-1}\text{)} = \frac{\Delta A_{410} / \text{min} \times (\text{df})}{(0.1)} \quad (1)$$

138

139

140

#### 141 SUPPLEMENTARY REFERENCES

- 142 1. **Kim JC, Cha SH, Jeong ST, Oh SK, Byun SM.** 1991. Molecular cloning and nucleotide  
143 sequence of *Streptomyces griseus* trypsin gene. Biochem. Biophys. Res. Commun.  
144 **181**:707-713.
- 145 2. **Cereghino JL, Cregg JM.** 2000. Heterologous protein expression in the methylotrophic yeast  
146 *Pichia pastoris*. FEMS Microbiol. Rev. **24**:45-66.

147
